---

1 **Temporal analysis of the clinical evolution of confirmed cases of COVID-19 in the**  
2 **state of Mato Grosso do Sul - Brazil**

3

4 Carolina Mariano Pompeo<sup>1,4</sup>¶\*, Marcos Antonio Ferreira Júnior<sup>2</sup>¶, Andréia Insabralde  
5 de Queiroz Cardoso<sup>2,4</sup>¶, Luciana Scarlazzari Costa<sup>3</sup>¶, Mercy da Costa Souza<sup>1,4</sup>¶, Felipe  
6 Machado Mota<sup>2</sup>¶ and Maria Lúcia Ivo<sup>4</sup>¶

7

8 <sup>1</sup> Maria Aparecida Pedrossian University Hospital. Federal University of Mato Grosso  
9 do Sul.

10 <sup>2</sup> Integrated Health Institute. Federal University of Mato Grosso do Sul.

11 <sup>3</sup> Piracicaba Methodist University.

12 <sup>4</sup> School of Medicine. Federal University of Mato Grosso do Sul.

13

14 \*Corresponding author:

15 E-mail; [carolmpompeo@gmail.com](mailto:carolmpompeo@gmail.com) (CMP)

16

17 ¶ All the authors contributed equally to this article.

18

---

## 19 Abstract

20 The objective was to analyze the evolution of confirmed cases of COVID-19 in the first  
21 four months of the pandemic in Mato Grosso do Sul, a state in the Center-West region  
22 of Brazil, as well as the factors related to the prevalence of deaths. This was an  
23 observational study with a cross-sectional and time series design based on data from the  
24 information system of the State Department of Health of Mato Grosso do Sul, Brazil.  
25 The microdata from the epidemiological bulletin is open and in the public domain;  
26 consultation was carried out from March to July 2020. The incidences were stratified  
27 per 100,000 inhabitants. The cross-section study was conducted to describe COVID-19  
28 cases, and the trend analysis was performed using polynomial regression models for  
29 time series, with R-Studio software and a significance level of 5%. There was a  
30 predominance of women among the cases, and of men in terms of deaths. The presence  
31 of comorbidities was statistically related to mortality, particularly lung disease and  
32 diabetes, and the mean age of the deaths was 67.7 years. Even though the macro-region  
33 of the state capital, Campo Grande, had a higher number of cases, the most fatalities  
34 were in the macro-region of Corumbá. The trend curve demonstrated discreet growth in  
35 the incidence of cases between epidemiological weeks 11 and 19, with a significant  
36 increase in week 20 throughout the state. The trend for COVID-19 in the state of Mato  
37 Grosso do Sul was upward and regular, but there was an important and alarming  
38 exponential increase. The health authorities should adopt the necessary measures to  
39 enforce health precautions and encourage social distancing of the population so that  
40 health services will be able to care for those afflicted by the disease, especially older  
41 people, those with comorbidities, and vulnerable sectors of the population.

42 **Keywords:** Pandemics; Coronavirus; Respiratory tract diseases.

43

---

## 44 Introduction

45 The respiratory disease known as *Coronavirus Disease 2019* (COVID-19) is  
46 caused by the virus *Severe Acute Respiratory Syndrome, Coronavirus 2* (SARS-CoV-  
47 2)<sup>1</sup>. CoVs are from the order *Nidovirales*, family *Coronaviridae* and subfamily  
48 *Coronavirinae*. They are single-stranded RNA virus groups that can cause respiratory,  
49 liver, gastrointestinal and neurological diseases in animal species and humans<sup>2</sup>.

50 Historically, in 2003, the first major epidemic of the 21<sup>st</sup> century arose in China,  
51 caused by the virus *Severe Acute Respiratory Syndrome, Coronavirus* (SARS-CoV),  
52 subtypes of the virus *Influenza A*, which have also sparked epidemics around the world.  
53 In 2014, the variation H5N1 was responsible for an epidemic in Asian countries and, in  
54 2009, the first pandemic of the 21<sup>st</sup> century occurred, caused by another variation of the  
55 virus, H1N1. In 2012, the *Middle East Respiratory Syndrome Coronavirus* (MERS-  
56 CoV) gave rise to an epidemic that started in Saudi Arabia and spread to another 27  
57 countries<sup>2-4</sup>.

58 COVID-19 was first detected at the end of December 2019, in the city of Wuhan  
59 in China, and was declared an international public health emergency on January 30,  
60 2020. This marked the third highly pathogenic introduction of the coronavirus in  
61 humans in the 21<sup>st</sup> century<sup>1</sup>.

62 In Mato Grosso do Sul, a state located in the Center-West region of Brazil, the first  
63 cases of COVID-19 were identified in the beginning of March 2020, and the first death  
64 occurred on the 31<sup>st</sup> of that same month. The first two confirmations were people who  
65 had had contact with positive cases originating from the states of São Paulo and Rio de  
66 Janeiro. The first death in the state was a 64-year-old woman infected by the  
67 coronavirus after having had contact with family members coming from Belgium<sup>5,6</sup>. On

---

68 April 13, the first case of community transmission in the state was confirmed, and the  
69 number of cases has substantially increased since then<sup>7</sup>.

70 Various measures were recommended by the World Health Organization for  
71 countries around the world to reduce increased dissemination of the COVID-19 virus<sup>8</sup>.  
72 The transmission of respiratory pathogens, such as the coronavirus, depends on their  
73 being transported by secretions transmitted between people in the form of aerosols,  
74 droplets, or secretions, or by direct contact with mucosa<sup>1,9</sup>.

75 The mortality rate for COVID-19 has still not been clearly determined, since it is  
76 rising in most countries. However, it has already been proven that people with  
77 comorbidities, such as cardiovascular diseases, diabetes, cancers and  
78 immunosuppression, in addition to older people, are at greater risk. The contagion rate  
79 seems to vary among countries, which may be directly related to local health responses  
80 for social isolation and care of the affected population<sup>10</sup>.

81 The rapid dynamics of the COVID-19 pandemic are a challenge and source of  
82 concern for healthcare systems in different locations, especially emerging countries  
83 such as Brazil, because fragile social and economic contexts may lead to underreporting  
84 and make adequate management of the pandemic more difficult, which increases  
85 uncertainties as to the dynamics of the disease<sup>11</sup>.

86 Despite the implementation of measures and strategies to reduce the transmission  
87 of COVID-19, the number of cases is expected to rise in all the Brazilian states. There is  
88 a concern about the availability of intensive care unit beds and ventilator support for  
89 hospitalized patients, in addition to specific diagnostic tests in sufficient amounts to  
90 monitor the development of the disease<sup>12</sup>.

91 Due to the epidemiological importance of COVID-19 for Brazil and the world, it is  
92 necessary to ascertain the real situation of the pandemic in the Brazilian states in order

---

93 to provide support for the creation of guidelines and the decisions that need to be made.  
94 Therefore, this study sought to analyze the temporal trend of confirmed cases of  
95 COVID-19 in the first four months of the pandemic in Mato Grosso do Sul, a state in  
96 the Center-West region of Brazil, and in its macro-regions, as well as the factors related  
97 to the prevalence of deaths.

98

## 99 **Materials and Methods**

100 This was an observational, time series study of confirmed cases of COVID-19 in  
101 Mato Grosso do Sul, Brazil, in the first four months of the pandemic – a period that  
102 spans the epidemiological weeks (EW) 11 to 28. The data was from an open database of  
103 the State Department of Health of Mato Grosso, available in microdata from the  
104 COVID-19 epidemiological bulletin. The population for calculating the incidence was  
105 obtained through data from the Brazilian Institute of Geography and Statistics (IBGE)  
106 from 2019. Both databases are in the public domain and do not require previous  
107 consideration or authorization by a research ethics committee. The data was collected  
108 between March and July 2020 and was tabulated on spreadsheets using Microsoft Excel  
109 2010<sup>®</sup>.

110 In the statistical analysis, a cross-sectional study was first conducted with data  
111 from COVID-19 patients from the state of Mato Grosso do Sul that sought to describe  
112 the COVID-19 cases in the state according to situation/status of the disease and  
113 characteristics of the population.

114 A regression model was estimated to verify factors related to death/non-death,  
115 which in this case was considered as a dependent variable. The situation of the patients  
116 originally coded in the database as death, non-death, recovered or in home treatment  
117 were treated in a grouped manner for analysis purposes. Therefore two groups were

---

118 created – death and non-death – with the latter including those who recovered and those  
119 in home treatment. The independent variables were sociodemographics, comorbidities,  
120 and signs and symptoms of the disease. A total of 555 patients was excluded from the  
121 sample, whose information was ignored, and 37 patients who were hospitalized.

122 The data was initially presented through descriptive statistics, absolute values,  
123 percentage, and mean, minimum and maximum values, according to the type of  
124 variable. Association tests were then performed using the chi-square or Fisher’s exact  
125 test and the Student’s t-test for comparison of means. Following this, the risk  
126 measurement and crude prevalence ratio were estimated, through univariate Poisson  
127 modeling, to assess the magnitude of the risk of death based on the characteristics of the  
128 study.

129 Last, the Poisson multiple regression model to verify the factors related to the  
130 prevalence of death among patients with COVID-19 was adjusted. In this model, the  
131 possible confounding variables were determined and possible interactions were tested  
132 (respiratory difficulties, pulmonary problems, sex and race).

133 Apart from the regression analysis, a trend analysis was performed in relation to  
134 EW 11 to 28 using polynomial regression models for time series. The dependent  
135 variable refers to the COVID-19 incidence coefficients and the independent variable  
136 refers to the epidemiological weeks. Temporal graphs were built for the coefficients, for  
137 the state and macro-regions, to verify the possible format of the trend curve to be  
138 studied. Next, polynomial regression models were estimated; first, the linear regression  
139 model was tested ( $Y = \beta_0 + \beta_1 X$ ) and then the more complex models, such as those of  
140 the 2<sup>nd</sup> order ( $Y = \beta_0 + \beta_1 X + \beta_2 X^2$ ), 3<sup>rd</sup> order ( $Y = \beta_0 + \beta_1 X + \beta_2 X^2 + \beta_3 X^3$ ) and  
141 exponential ( $Y = \beta_0 e^{\beta_1 X}$ ).

142 The time variable (EW) was centralized to the mean point of the series to avoid  
143 auto-correlations. The models were chosen according to their statistical significance,  
144 residual analysis, and coefficient of determination ( $R^2$ ).

145 R-Studio statistical software with a significance level of 5% was used for all the  
146 analyses.

147

## 148 **Results**

149 From the first confirmed case of COVID-19 in EW 11 until the end of EW 28, a  
150 total of 14,092 cases was diagnosed, with an incidence of 507.09 per 100,000  
151 inhabitants. The macro-region of Campo Grande, the most populous in the state, which  
152 is home to the state capital, had the highest number of confirmations of the disease  
153 (48%). However, the highest incidence was in the macro-region of Dourados with  
154 688.24 cases per 100,000 inhabitants. The second highest incidence occurred in  
155 Corumbá (488.96), followed by Campo Grande (445.45) and then Três Lagoas (309.21).  
156 Among those diagnosed, approximately 93% were asymptomatic patients.

157 There was a higher number of infections among young adults in the age group of  
158 30 to 39 years old (27.5%), and the highest number of deaths occurred among older  
159 people (above 60 years old) in more than 70% of the case. In all the age groups, most  
160 patients recovered from the disease. Of the total number of deaths, more than 85% of  
161 the cases had at least one associated comorbidity, and almost half of the cases (48%)  
162 had two or more. The distribution of the cases according to health situation and age is  
163 presented in Figure 1.

164

165 **Figure 1: Distribution by age and situation of patients with COVID-19 in Mato**  
166 **Grosso do Sul, Brazil, 2020.**

167 Among the state's macro-regions, the highest fatality rate was 2.58 in Corumbá,  
168 followed by 2.17 in Três Lagoas and 1.66 in Dourados; the lowest fatality rate was in  
169 the macro-region of Campo Grande.

170 The variables corresponding to age, ethnic group, sex, macro-region, race, fever,  
171 sore throat, respiratory difficulties, number of symptoms, type of test for detecting  
172 COVID-19, pulmonary problems, diabetes, number of comorbidities, and occupation  
173 (whether a health professional or not) had a statistical relationship with the patients'  
174 situation. The groups of patients that died, and those that did not, were heterogeneous in  
175 relation to these characteristics. The breakdown of the data is presented in Table 1.

176

177 **Table 1. Characteristics of the patients with confirmed cases of infection by**  
178 **COVID-19 in Mato Grosso do Sul, SES/MS<sup>1</sup>. Brazil, 2020 (n=14,092).**

179

| Characteristics            | Total<br>(n=14,092)   | Death<br>(n=221)       | Non-death<br>(n=13,871) | p-value                       |
|----------------------------|-----------------------|------------------------|-------------------------|-------------------------------|
| <b>Mean age (min-max)</b>  | 38.4 (0.0 -<br>102.0) | 67.7 (25.0 -<br>100.0) | 37.9 (0.0 -<br>102.0)   | <b>&lt; 0.001<sup>2</sup></b> |
| <b>Age groups, n (%)</b>   |                       |                        |                         |                               |
| 0 – 9 years old            | 404 (2.9)             | 0 (0.0)                | 404 (2.9)               | <b>&lt; 0.001</b>             |
| 10 – 19 years old          | 716 (5.1)             | 0 (0.0)                | 716 (5.2)               |                               |
| 20 – 29 years old          | 2,975 (21.1)          | 4 (1.8)                | 2,971 (21.4)            |                               |
| 30 – 39 years old          | 3,877 (27.5)          | 9 (4.1)                | 3,868 (27.9)            |                               |
| 40 – 49 years old          | 2,981 (21.1)          | 12 (5.4)               | 2,969 (21.4)            |                               |
| 50 – 59 years old          | 1,879 (13.3)          | 35 (15.8)              | 1,844 (13.3)            |                               |
| 60 years old or more       | 1,260 (8.9)           | 161 (72.9)             | 1,099 (7.9)             |                               |
| <b>Sex, n (%)</b>          |                       |                        |                         |                               |
| Male                       | 6,719 (47.7)          | 125 (56.6)             | 6,594 (47.5)            | <b>0.009</b>                  |
| Female                     | 7,373 (52.3)          | 96 (43.4)              | 7,277 (52.5)            |                               |
| <b>Macro-region, n (%)</b> |                       |                        |                         |                               |
| Campo Grande               | 6,771 (48.0)          | 89 (40.3)              | 6,682 (48.2)            | <b>0.022</b>                  |
| Corumbá                    | 659 (4.7)             | 17 (7.7)               | 642 (4.6)               |                               |
| Dourados                   | 5,785 (41.1)          | 96 (43.4)              | 5,689 (41.0)            |                               |
| Três Lagoas                | 877 (6.2)             | 19 (8.6)               | 858 (6.2)               |                               |
| <b>Race/color</b>          |                       |                        |                         |                               |
| Yellow                     | 953 (7.2)             | 7 (3.6)                | 946 (7.3)               | <b>0.019</b>                  |
| White                      | 7,204 (54.5)          | 94 (47.7)              | 7,110 (54.6)            |                               |
| Indigenous                 | 278 (2.1)             | 4 (2.0)                | 274 (2.1)               |                               |
| Brown                      | 4,302 (32.5)          | 84 (42.6)              | 4,218 (32.4)            |                               |



|                                   |               |             |               |                   |
|-----------------------------------|---------------|-------------|---------------|-------------------|
| Black                             | 487 (3.7)     | 8 (4.1)     | 479 (3.6)     |                   |
| <b>Signs/Symptoms, n (%)</b>      |               |             |               |                   |
| Fever                             |               |             |               |                   |
| Yes                               | 781 (78.5)    | 138 (66.7)  | 643 (81.6)    | <b>&lt;0.001</b>  |
| No                                | 214 (21.5)    | 69 (33.3)   | 145 (18.4)    |                   |
| Cough                             |               |             |               |                   |
| Yes                               | 849 (84.1)    | 168 (80.8)  | 681 (85.1)    | 0.165             |
| No                                | 160 (15.8)    | 40 (19.2)   | 120 (14.9)    |                   |
| Sore throat                       |               |             |               |                   |
| Yes                               | 347 (36.7)    | 54 (28.0)   | 293 (38.9)    | <b>0.006</b>      |
| No                                | 599 (63.3)    | 139 (72.0)  | 460 (61.1)    |                   |
| Difficulty breathing              |               |             |               |                   |
| Yes                               | 663 (67.5)    | 157 (77.0)  | 506 (65.0)    | <b>0.001</b>      |
| No                                | 319 (32.5)    | 47 (23.0)   | 272 (35.0)    |                   |
| Number of symptoms                |               |             |               |                   |
| None                              | 13,078 (92.8) | 10 (4.5)    | 13,068 (94.2) | <b>&lt;0.001</b>  |
| One or more                       | 1,014 (7.2)   | 211 (95.5)  | 803 (5.8)     |                   |
| <b>Type of test</b>               |               |             |               |                   |
| RT-PCR                            | 8,087 (57.6)  | 199 (90.0)  | 7,888 (57.1)  | <b>&lt;0.001</b>  |
| Serology                          | 135 (0.0)     | 0 (0.0)     | 135 (1.0)     |                   |
| Quick test                        | 5,806 (41.4)  | 22 (10.0)   | 5,784 (41.9)  |                   |
| <b>Comorbidities, n (%)</b>       |               |             |               |                   |
| Pulmonary problem                 |               |             |               |                   |
| Yes                               | 679 (71.1)    | 153 (77.3)  | 526 (69.5)    | <b>0.040</b>      |
| No                                | 276 (28.9)    | 45 (22.7)   | 231 (30.5)    |                   |
| Kidney problem                    |               |             |               |                   |
| Yes                               | 6 (1.8)       | 3 (2.9)     | 3 (1.3)       | 0.376             |
| No                                | 330 (98.2)    | 100 (97.1)  | 230 (98.7)    |                   |
| Weak immunity                     |               |             |               |                   |
| Yes                               | 2 (0.0)       | 0 (0.0)     | 2 (0.9)       | ~1.000            |
| No                                | 333 (99.4)    | 103 (100.0) | 230 (99.1)    |                   |
| Diabetes                          |               |             |               |                   |
| Yes                               | 257 (58.7)    | 90 (66.7)   | 167 (55.1)    | <b>0.030</b>      |
| No                                | 181 (41.3)    | 45 (33.3)   | 136 (44.9)    |                   |
| Immunosuppression                 |               |             |               |                   |
| Yes                               | 23 (6.6)      | 8 (7.5)     | 15 (6.2)      | 0.841             |
| No                                | 325 (93.4)    | 99 (92.5)   | 226 (93.8)    |                   |
| Heart disease                     |               |             |               |                   |
| Yes                               | 236 (54.0)    | 82 (61.2)   | 154 (50.8)    | 0.060             |
| No                                | 201 (46.0)    | 52 (38.8)   | 149 (49.2)    |                   |
| High-risk pregnancy               |               |             |               |                   |
| Yes                               | 6 (1.7)       | 2 (2.7)     | 4 (1.4)       | 0.607             |
| No                                | 355 (98.3)    | 72 (97.3)   | 283 (98.6)    |                   |
| Number of comorbidities           |               |             |               |                   |
| None                              | 13,290 (94.3) | 32 (14.5)   | 13,258 (95.6) | <b>&lt;0.001</b>  |
| One                               | 494 (3.5)     | 83 (37.5)   | 411 (2.9)     |                   |
| Two or more                       | 308 (2.2)     | 106 (48.0)  | 202 (1.5)     |                   |
| <b>Health professional, n (%)</b> |               |             |               |                   |
| Yes                               | 1,835 (13.0)  | 7 (3.2)     | 1,828 (13.2)  | <b>&lt; 0.001</b> |

|                                    |               |            |               |        |
|------------------------------------|---------------|------------|---------------|--------|
| No                                 | 12,257 (86.9) | 214 (86.8) | 12,043 (86.8) |        |
| <b>Security team member, n (%)</b> |               |            |               |        |
| Yes                                | 198 (1.6)     | 0 (0.0)    | 198 (1.6)     | ~1.000 |
| No                                 | 12,472 (98.4) | 1 (0.0)    | 12,471 (98.4) |        |

180 <sup>1</sup> SES/MS: State Department of Health of Mato Grosso do Sul

181 <sup>2</sup> Mean comparison test (Student's test)

182

183 The characteristics that had statistically significant associations with the patient's  
184 situation in the multiple context were age, classified into distribution quartiles, location  
185 of the patient (macro-region), and number of comorbidities, controlled by sex and  
186 race/color. The interactions between respiratory difficulties and pulmonary problems  
187 and between sex and race/color were tested, but did not reach statistical significance.

188 In relation to the factors associated with prevalence of death by COVID-19, the  
189 prevalence was 13.34 times higher in the age group of 60 years old or more, compared  
190 to the age group of 0 to 29 years (baseline), regardless of location and number of  
191 comorbidities. Individuals with two or more associated comorbidities had 62.37 times  
192 more risk of dying, compared to individuals without comorbidities, regardless of  
193 location and age group (Table 2).

194

195 **Table 2. Factors associated with prevalence of death by COVID-19 in patients with**  
196 **confirmed cases in Mato Grosso do Sul, SES/MS<sup>1</sup>. Brazil, 2020 (n=14.092).**

197

| <b>Characteristics</b>            | <b><math>\beta_{\text{crude}}</math> (CI 95%)</b> | <b><math>PR_{\text{crude}}</math> (CI 95%)</b> | <b><math>PR^2_{\text{adj}}</math> (CI 95%)</b> |
|-----------------------------------|---------------------------------------------------|------------------------------------------------|------------------------------------------------|
| <b>Age, quartiles (years old)</b> |                                                   |                                                |                                                |
| 00 – 29                           |                                                   | Baseline                                       |                                                |
| 30 – 49                           | 1.14 (0.18 - 2.37)                                | 3.13 (1.19 - 10.74)                            |                                                |
| 50 - 59                           | 2.94 (2.03 - 4.16)                                | 19.07 (7.62 - 63.82)                           | 5.24 (2.02 - 17.89)                            |
| 60 or more                        | 4.87 (4.01 - 6.05)                                | 130.82 (55.39 - 425.05)                        | 13.34 (5.36 - 33.66)                           |
| <b>Macro-region</b>               |                                                   |                                                |                                                |
| Campo Grande                      |                                                   | Baseline                                       |                                                |
| Corumbá                           | 0.67 (0.12 - 1.16)                                | 1.96 (1.12 - 3.21)                             | 2.46 (1.39 - 4.08)                             |

---

|                                |                     |                         |                        |
|--------------------------------|---------------------|-------------------------|------------------------|
| Dourados                       | 0.23 (-0.05 - 0.52) | 1.26 (0.94 - 1.68)      | 1.41 (1.03 - 1.93)     |
| Três Lagoas                    | 0.49 (-0.02 - 0.97) | 1.65 (0.97 - 2.64)      | 1.81 (1.03 - 3.02)     |
| <b>Number of comorbidities</b> |                     |                         |                        |
| None                           |                     | Baseline                |                        |
| One                            | 4.24 (3.85 - 4.67)  | 69.78 (46.91 - 106.38)  | 42.73 (26.43 - 71.63)  |
| Two or more                    | 4.96 (4.58 - 5.37)  | 142.93 (97.48 - 215.54) | 62.37 (38.52 - 105.06) |

---

198 <sup>1</sup> SES/MS: State Department of Health of Mato Grosso do Sul

199 <sup>2</sup> Prevalence Ratio obtained through the Poisson regression model, adjusted by sex and  
200 race

201

202 Figure 2 presents the growth curves of the COVID-19 incidence coefficients in  
203 Mato Grosso do Sul and the state's macro-regions, in the period encompassing  
204 epidemiological weeks 11 to 18. Growth was similar among the regions until week 20,  
205 after which time the curves were different between the regions, particularly the  
206 Dourados region, which had higher incidences from that time on and then dropped off at  
207 week 26.

208

209 **Figure 2: Evolution of cases of COVID-19, by macro-region and epidemiological**  
210 **week**

211

212 The overall coefficient for incidence and death remained stable and had similar  
213 curves until week 19. Starting at week 20, a distance opened up between them, with an  
214 increase in the overall incidence coefficient (Figure 3).

215

216 **Figure 3: Evolution of cases and deaths by COVID-19, in Mato Grosso do Sul,**  
217 **Brazil.**

218 Table 3 and Figure 4 present the results of trend analysis for COVID-19 incidence  
219 coefficients in the state of Mato Grosso do Sul and its macro-regions for EW 11 to 28.  
220 All the models were statistically significant with coefficients of determinants over 0.85.

221

222 **Table 3. Analysis of the trend in the number of cases of COVID-19 according to**  
223 **macro-region, micro-region, sex, age group and comorbidities, SES/MS<sup>1</sup>. Brazil,**  
224 **2020 (n=14.092).**

225

| Characteristics           | Model       | $\beta_0$ | $\beta_1$ | $\beta_2$ | $\beta_3$ | $R^2$ | $p_{\text{model}}$ |
|---------------------------|-------------|-----------|-----------|-----------|-----------|-------|--------------------|
| <b>Macro-region</b>       |             |           |           |           |           |       |                    |
| Campo Grande              | Exponential | 5.86      | 0.37      |           |           | 0.94  | <0.001             |
| Dourados                  | Polynomial  | 23.81     | 12.38     | 0.56      | 0.09      | 0.91  | <0.001             |
| Corumbá                   | Polynomial  | 4.01      | 3.43      | 0.94      | 0.07      | 0.98  | <0.001             |
| Três Lagoas               | Polynomial  | 2.40      | n.s.      | 0.71      | 0.10      | 0.87  | <0.001             |
| <b>Mato Grosso do Sul</b> | Polynomial  | 8.36      | 4.70      | 0.78      | 0.04      | 0.99  | <0.001             |

226  $R^2$ : Coefficient of determination

227 n.s.: not significant

228 <sup>1</sup> State Department of Health of Mato Grosso do Sul

229

230 **Figure 4: Values observed and estimated by the trend models for COVID-19**  
231 **incidence coefficients in the macro-regions of Mato Grosso do Sul, Brazil.**

232

## 233 Discussion

234 This study examined the incidence, characteristics and temporal evolution of  
235 COVID-19 cases in Mato Grosso do Sul, Brazil, in epidemiological weeks 11 to 28.  
236 Even though the data indicated a substantial number of recovered cases, among the  
237 more serious cases of the disease, 222 (1.57%) ended in death. Of these, the majority

---

238 had at least one associated comorbidity or involved people over 60 years old, with or  
239 without associated chronic diseases<sup>13,14</sup>.

240 In addition, the presence of one and, mainly, two or more comorbidities were  
241 independent risk factors for death, similar to that observed in the international context  
242 of the pandemic<sup>15-17</sup>

243 Among the comorbidities found, pulmonary disease and diabetes had an  
244 association with the occurrence of deaths, which is consistent with increased risk of  
245 mortality in patients with these comorbidities observed in other studies<sup>17,18</sup>.

246 There was a higher number of deaths among men, even though the incidence of  
247 cases was higher among women. Studies conducted during this pandemic and in other  
248 SARS pandemics have also indicated more serious evolution of the disease among men  
249 and associations with more deaths among these cases<sup>18,19</sup>. The higher fatality rate noted  
250 among the brown race was also confirmed in Brazil's North region, where this rate was  
251 found to be higher among brown and black individuals, which may be related to  
252 differences in susceptibility to COVID-19 and access to adequate health care by this  
253 segment of the population<sup>20,21</sup>.

254 The signs and symptoms manifested by patients, such as fever and respiratory  
255 difficulties, were associated with higher mortality. The clinical manifestations of  
256 COVID-19 appear to vary from region to region<sup>22</sup>, although the most frequent ones in  
257 symptomatic patients have been found to be fever and fatigue, and the most common  
258 complications have been pneumonia and respiratory insufficiency<sup>23,24</sup>.

259 The higher distribution of the disease in the macro-region of Dourados may be due  
260 to population density, as well as the extensive territory of the region's main city, which  
261 often results in the need to commute by public transportation, and the presence of work  
262 locations with large numbers of people on production lines, such as meatpacking plants

---

263 - factors that favor dispersion and, consequently, viral contamination<sup>25</sup>. Of the most  
264 important cities in Mato Grosso do Sul, economically and population-wise, three stand  
265 out as at high risk for COVID-19 and account for approximately 44% of the state's  
266 population: Campo Grande, Dourados and Três Lagoas<sup>26</sup>.

267 Although the incidence of cases was higher in the macro-region of Dourados, the  
268 largest proportion of deaths occurred in the region of Corumbá, which had a mortality  
269 rate of 2.58% and a statistically significant relationship among the regions. This index  
270 exceeded the calculated estimate for COVID-19 in China, where the mortality rate was  
271 1.4%<sup>27</sup>, but was lower than the overall mortality rate of 6.52% in Mexico<sup>28</sup>. There are  
272 still many uncertainties and unknowns in relation to the viral mortality of COVID-19,  
273 since it is related to other factors<sup>29</sup>.

274 In terms of the evolution of cases, the data seems to suggest a growing and regular  
275 trend throughout the state, with a more significant increase after EW 20, the period that  
276 coincides with the start of winter in the Center-West region and, consequently, a period  
277 of higher transmission of respiratory diseases<sup>30</sup>.

278 There was also a statistically significant association in all the macro-regions of  
279 Mato Grosso do Sul, which enables the inference that the curve for COVID-19 is far  
280 from flattening, and may experience substantial and alarming growth. A mathematical  
281 model study conducted by researchers at the Federal University of Mato Grosso do  
282 Sul<sup>31</sup> pointed out the exponential growth of the disease infection curve between the  
283 months of August and September, with probable collapse of the public health system if  
284 mitigation measures are not taken by managers<sup>32</sup>.

285 Understanding the dynamics of the disease and its ecological evidence and  
286 evolution worldwide are important factors for developing epidemiological perception  
287 and analysis of the impacts<sup>26,29</sup>. Therefore, this study sought to operate within this

---

288 context, in order to contribute to a more complete picture of the epidemiological  
289 situation of COVID-19 in Brazil, and consequently in the world, in order to assist the  
290 scientific community and health managers with decision-making. One of the limitations  
291 of this study, similar to others with cross-sectional designs that use secondary data, is  
292 related to the time of the outcomes with regard to COVID-19 in the population, since  
293 there may be underestimation of real data due to underreporting and the presence of  
294 non-symptomatic carriers, in addition to the reality of the organization of local health  
295 services.

296

## 297 **Conclusion**

298 The trend in relation to COVID-19 is growing and regular throughout the state of  
299 Mato Grosso do Sul, rising significantly after EW 20. This suggests that the state is far  
300 from flattening the curve, which has manifested exponential, substantial and alarming  
301 growth.

302 Health authorities must adopt appropriate measures to support health precautions  
303 and promote social distancing among the population in order to enable health services to  
304 care for those infected by the disease. Health actions need to especially target vulnerable  
305 groups and male patients due to their tendency toward higher mortality. Care should be  
306 reinforced among elderly people with comorbidities, as well as individuals in groups  
307 that are at risk of developing more serious forms of the disease.

308

## 309 **Acknowledgment**

310 The authors are grateful for the commitment and dedication of all professionals at  
311 the Maria Aparecida Pedrossian University Hospital of the Federal University of Mato

---

312 Grosso do Sul in combating this serious crisis and to the employees of the State  
313 Department of Health of Mato Grosso do Sul - Brazil, for maintaining an open and  
314 comprehensive database for research.

315

## 316 **References**

317 1. Guo Y-R, Cao Q-D, Hong Z-S, Tan Y-Y, Chen S-D, Jin H-J, et al. The origin,  
318 transmission and clinical therapies on coronavirus disease 2019 (COVID-19) outbreak–  
319 an update on the status. *Mil Med Res*. 2020;7(1):1-10.

320 2. Hui DS. Epidemic and emerging coronaviruses (severe acute respiratory  
321 syndrome and Middle East respiratory syndrome). *Clin Chest Med*. 2017;38(1):71-86.

322 3. Sims L, Domenech J, Benigno C, Kahn S, Kamata A, Lubroth J, et al. Origin  
323 and evolution of highly pathogenic H5N1 avian influenza in Asia. *Vet Rec*.  
324 2005;157(6):159-64.

325 4. Neumann G, Noda T, Kawaoka Y. Emergence and pandemic potential of swine-  
326 origin H1N1 influenza virus. *Nature*. 2009;459(7249):931-9.

327 5. Secretaria de estado de saúde de Mato Grosso do Sul. Secretaria de Saúde  
328 registra primeira morte pelo coronavírus em Mato Grosso do Sul Mato Grosso do  
329 Sul2020 [cited 2020 23 aug 2020]. Available from:  
330 <https://www.coronavirus.ms.gov.br/?p=586>.

331 6. Secretaria de estado de saúde de Mato Grosso do Sul. Secretaria de Saúde  
332 confirma dois casos de coronavírus em Mato Grosso do Sul Mato Grosso do Sul2020  
333 [cited 2020 15 aug 2020]. Available from: [http://www.ms.gov.br/secretaria-de-saude-  
334 confirma-dois-casos-de-coronavirus-em-mato-grosso-do-sul/](http://www.ms.gov.br/secretaria-de-saude-confirma-dois-casos-de-coronavirus-em-mato-grosso-do-sul/).



- 
- 335 7. Secretaria de estado de saúde de Mato Grosso do Sul. Boletim epidemiológico  
336 COVID-19 Mato Grosso do Sul2020 [cited 2020 15 aug 2020]. Available from:  
337 [http://www.ms.gov.br/wp-content/uploads/sites/150/2020/04/Boletim-](http://www.ms.gov.br/wp-content/uploads/sites/150/2020/04/Boletim-Epidemiol%C3%B3gico-COVID-19-2020.04.13.pdf)  
338 [Epidemiol% C3%B3gico-COVID-19-2020.04.13.pdf](http://www.ms.gov.br/wp-content/uploads/sites/150/2020/04/Boletim-Epidemiol%C3%B3gico-COVID-19-2020.04.13.pdf).
- 339 8. World Health Organization. 2019-nCoV outbreak is an emergency of  
340 international concern Genebra2020 [cited 2020 25 jul 2020]. Available from:  
341 [http://www.euro.who.int/en/health-topics/health-emergencies/international-health-](http://www.euro.who.int/en/health-topics/health-emergencies/international-health-regulations/news/news/2020/2/2019-ncov-outbreak-is-an-emergency-of-international-concern)  
342 [regulations/news/news/2020/2/2019-ncov-outbreak-is-an-emergency-of-international-](http://www.euro.who.int/en/health-topics/health-emergencies/international-health-regulations/news/news/2020/2/2019-ncov-outbreak-is-an-emergency-of-international-concern)  
343 [concern](http://www.euro.who.int/en/health-topics/health-emergencies/international-health-regulations/news/news/2020/2/2019-ncov-outbreak-is-an-emergency-of-international-concern).
- 344 9. Otter J, Donskey C, Yezli S, Douthwaite S, Goldenberg S, Weber D.  
345 Transmission of SARS and MERS coronaviruses and influenza virus in healthcare  
346 settings: the possible role of dry surface contamination. *J Hosp Infect.* 2016;92(3):235-  
347 50.
- 348 10. Triggler CR, Bansal D, Abd Farag EAB, Ding H, Sultan AA. COVID-19:  
349 Learning from Lessons To Guide Treatment and Prevention Interventions. *Msphere.*  
350 2020;5(3):1-13.
- 351 11. Reis RF, de Melo Quintela B, de Oliveira Campos J, Gomes JM, Rocha BM,  
352 Lobosco M, et al. Characterization of the COVID-19 pandemic and the impact of  
353 uncertainties, mitigation strategies, and underreporting of cases in South Korea, Italy,  
354 and Brazil. *Chaos Solitons Fractals.* 2020:109888.
- 355 12. Croda J, Oliveira WKd, Frutuoso RL, Mandetta LH, Baia-da-Silva DC, Brito-  
356 Sousa JD, et al. COVID-19 in Brazil: advantages of a socialized unified health system  
357 and preparation to contain cases. *Rev Soc Bras Med Trop.* 2020;53.

- 
- 358 13. de Souza WM, Buss LF, da Silva Candido D, Carrera J-P, Li S, Zarebski AE, et  
359 al. Epidemiological and clinical characteristics of the COVID-19 epidemic in Brazil.  
360 Nat Hum Behav. 2020:1-9.
- 361 14. Giorgi Rossi P, Marino M, Formisano D, Venturelli F, Vicentini M, Grilli R, et  
362 al. Characteristics and outcomes of a cohort of COVID-19 patients in the Province of  
363 Reggio Emilia, Italy. PloS one. 2020;15(8):e0238281.
- 364 15. Imam Z, Odish F, Gill I, O'Connor D, Armstrong J, Vanood A, et al. Older age  
365 and comorbidity are independent mortality predictors in a large cohort of 1305 COVID-  
366 19 patients in Michigan, United States. J Intern Med. 2020.
- 367 16. Parohan M, Yaghoubi S, Seraji A, Javanbakht MH, Sarraf P, Djalali M. Risk  
368 factors for mortality in patients with Coronavirus disease 2019 (COVID-19) infection: a  
369 systematic review and meta-analysis of observational studies. Aging Male. 2020:1-9.
- 370 17. Bajgain KT, Badal S, Bajgain BB, Santana MJ. Prevalence of comorbidities  
371 among individuals with COVID-19: A rapid review of current literature. Am J Infect  
372 Control. 2020:1-9.
- 373 18. Stawicki SP, Jeanmonod R, Miller AC, Paladino L, Gaieski DF, Yaffee AQ, et  
374 al. The 2019–2020 novel coronavirus (severe acute respiratory syndrome coronavirus 2)  
375 pandemic: A joint american college of academic international medicine-world academic  
376 council of emergency medicine multidisciplinary COVID-19 working group consensus  
377 paper. J Glob Infect Dis. 2020;12(2):47-93.
- 378 19. Jin J-M, Bai P, He W, Wu F, Liu X-F, Han D-M, et al. Gender differences in  
379 patients with COVID-19: Focus on severity and mortality. Front Public Health.  
380 2020;8:152.
- 381 20. Ribeiro H, Lima VM, Waldman EA. In the COVID-19 pandemic in Brazil, do  
382 brown lives matter? Lancet Glob Health. 2020;8(8):e976-e7.

- 
- 383 21. Baqui P, Bica I, Marra V, Ercole A, van Der Schaar M. Ethnic and regional  
384 variations in hospital mortality from COVID-19 in Brazil: a cross-sectional  
385 observational study. *Lancet Glob Health*. 2020:e1018-e26.
- 386 22. Hashmi HAS, Asif HM. Early Detection and Assessment of Covid-19. *Frontiers*  
387 *in medicine*. 2020;7:311.
- 388 23. Jutzeler CR, Bourguignon L, Weis CV, Tong B, Wong C, Rieck B, et al.  
389 Comorbidities, clinical signs and symptoms, laboratory findings, imaging features,  
390 treatment strategies, and outcomes in adult and pediatric patients with COVID-19: A  
391 systematic review and meta-analysis. *Travel Med Infect Dis*. 2020:1-32.
- 392 24. Iftimie S, López-Azcona AF, Vicente-Miralles M, Descarrega-Reina R,  
393 Hernández-Aguilera A, Riu F, et al. Risk factors associated with mortality in  
394 hospitalized patients with SARS-CoV-2 infection. A prospective, longitudinal,  
395 unicenter study in Reus, Spain. *PloS one*. 2020;15(9):e0234452.
- 396 25. Leiva GdC, Sathler D, Orrico Filho RD. Estrutura urbana e mobilidade  
397 populacional: implicações para o distanciamento social e disseminação da Covid-19.  
398 *Rev bras estud popul*. 2020;37:1-22.
- 399 26. Silva MHSd, Raoul MD, Cabrero DRO. Análise sobre risco e vulnerabilidade à  
400 COVID-19 no estado de Mato Grosso do Sul. *Hygeia*. 2020;0(0):164-74.
- 401 27. Wu JT, Leung K, Bushman M, Kishore N, Niehus R, de Salazar PM, et al.  
402 Estimating clinical severity of COVID-19 from the transmission dynamics in Wuhan,  
403 China. *Nat Med*. 2020;26(4):506-10.
- 404 28. Mendez-Dominguez N, Alvarez-Baeza A, Carrillo G. Demographic and Health  
405 Indicators in Correlation to Interstate Variability of Incidence, Confirmation,  
406 Hospitalization, and Lethality in Mexico: Preliminary Analysis from Imported and

- 
- 407 Community Acquired Cases during COVID-19 Outbreak. *Int J Environ Res Public*  
408 *Health*. 2020;17(12):4281.
- 409 29. Van Damme W, Dahake R, Delamou A, Ingelbeen B, Wouters E, Vanham G, et  
410 al. The COVID-19 pandemic: diverse contexts; different epidemics—how and why?  
411 *BMJ Glob Health*. 2020;5(7):e003098.
- 412 30. Alonso WJ, Schuck-Paim C, Freitas ARR, Kupek E, Wuerzius CR, Negro-  
413 Caldusch E, et al. Covid-19 em contexto: comparação com a mortalidade mensal por  
414 causas respiratórias nos estados brasileiros. *InterAm J Med Healt*. 2020;3:1-21.
- 415 31. Saraiva E, Sauer L. Estudo matemático mostra que casos da Covid-19 no MS  
416 dobram a cada 12 dias. Universidade Federal de Mato Grosso do Sul, Campo Grande,  
417 MS. 2020 [cited 2020 23 aug 2020]. Available from: [https://www.ufms.br/estudo-](https://www.ufms.br/estudo-matematico-mostra-que-casos-da-covid-19-no-ms-dobram-a-cada-12-dias/)  
418 [matematico-mostra-que-casos-da-covid-19-no-ms-dobram-a-cada-12-dias/](https://www.ufms.br/estudo-matematico-mostra-que-casos-da-covid-19-no-ms-dobram-a-cada-12-dias/).
- 419 32. Wang Y, Tian H, Zhang L, Zhang M, Guo D, Wu W, et al. Reduction of  
420 secondary transmission of SARS-CoV-2 in households by face mask use, disinfection  
421 and social distancing: a cohort study in Beijing, China. *BMJ Glob Health*.  
422 2020;5(5):e002794.

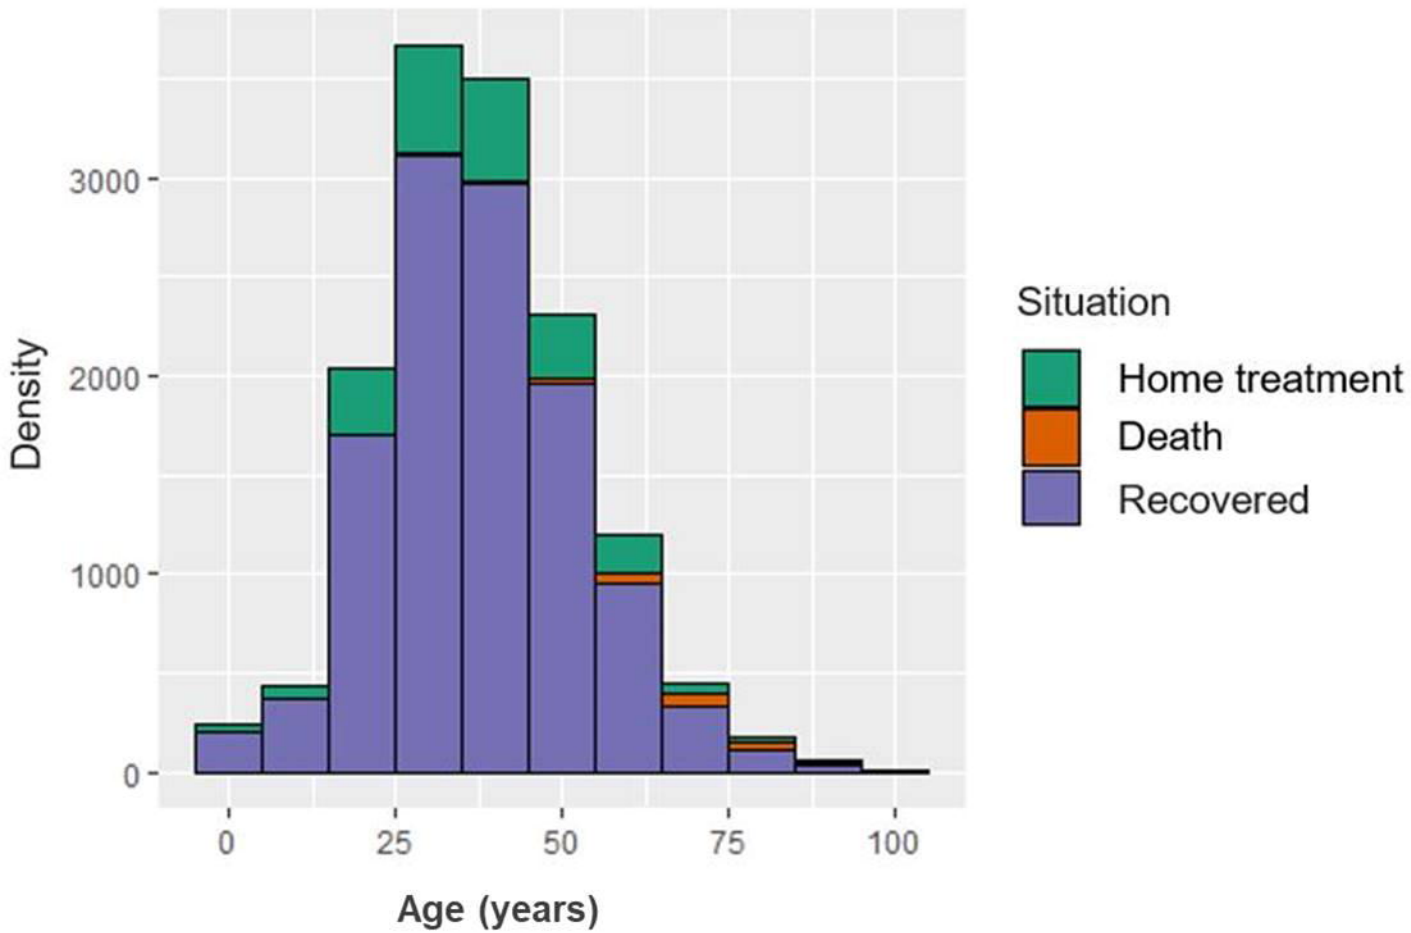

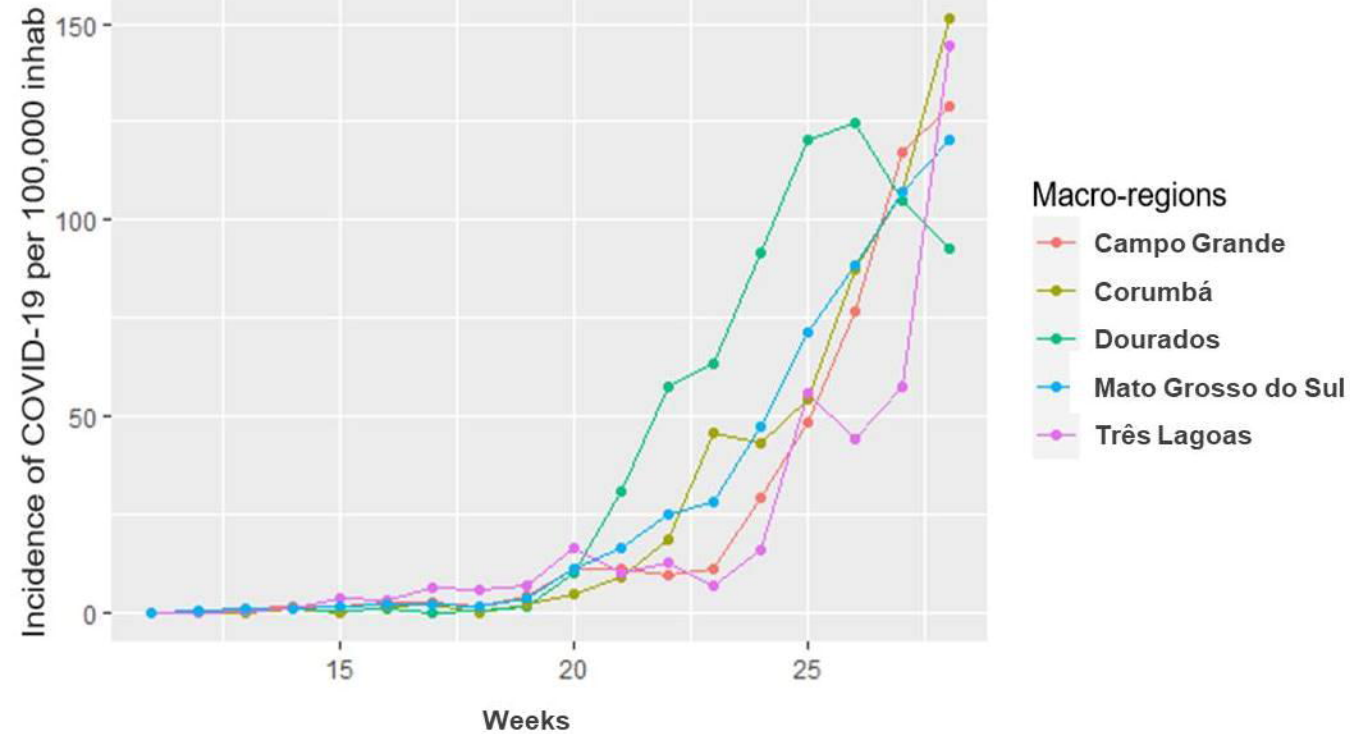

Incidence and death by COVID-19 per 100.000 inhab

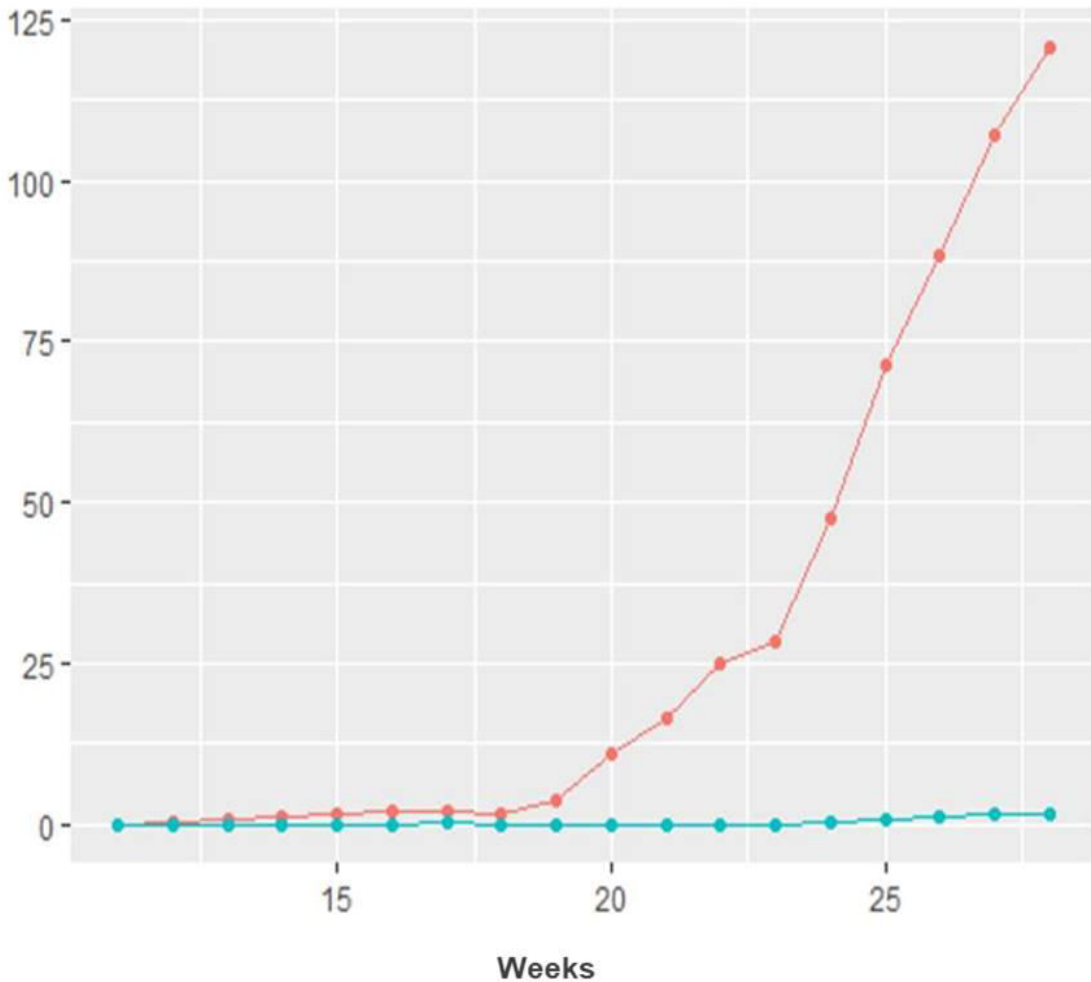

Coefficients

—●— Mato Grosso do Sul

—●— Deaths

### Campo Grande

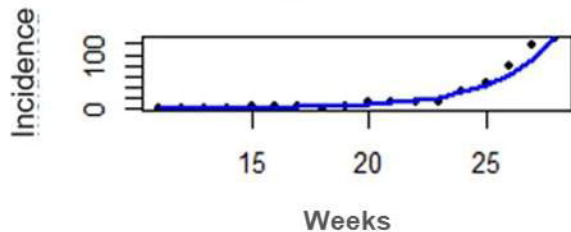

### Dourados

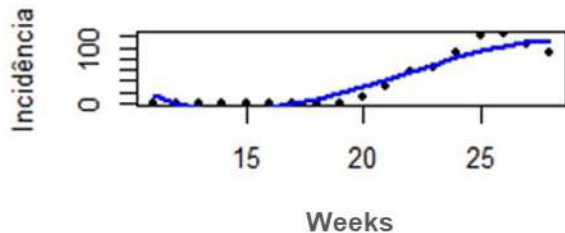

### Corumba

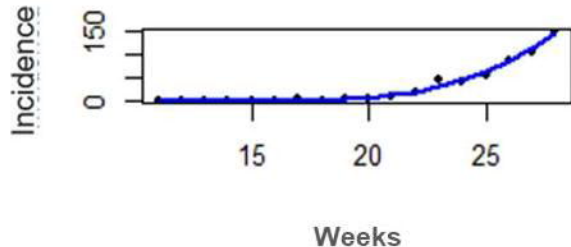

### Três Lagoas

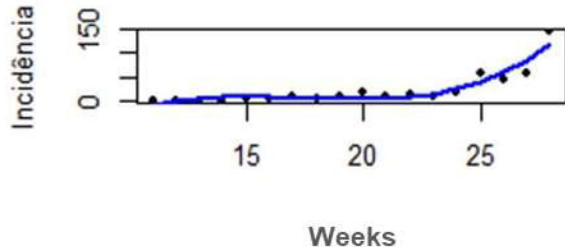

Source: https://medrxiv.org/content/10.1101/2020.09.21.20198812v1.full.pdf
